# Supplementary material for: Molecular effects of supraphysiological doses of doping agents on health
Source: Royal Society of Chemistry journal article supplement (doi:10.1039/c5mb00030k), 2015-03-10
Supplement: c5mb00030k1.pdf [file c5mb00030k1.pdf]

**Table S1** Summary of molecular effects induced by T/DHT supraphysiological doses in *in vitro* and *in vivo* systems

| System                                            | Supraphysiological treatment | Biological effect                                 | Molecular targets                          | Reference |
|---------------------------------------------------|------------------------------|---------------------------------------------------|--------------------------------------------|-----------|
| Neonatal rat ventricular cardiomyocytes           | 10 $\mu$ M                   | T-type $\text{Ca}^{2+}$ current                   | $\text{Ca}_v3.1$ , $\text{Ca}_v3.2$        | 91        |
| Neonatal and adult rat ventricular cardiomyocytes | 100 nM                       | L-type $\text{Ca}^{2+}$ current                   | $\text{Ca}_v1.2$                           | 92        |
| Rat aortic smooth muscle cell line (A7r5)         | 275 $\mu$ M                  | L- and T-type $\text{Ca}^{2+}$ current            | $\text{Ca}_v1.2$ , $\text{Ca}_v3.2$        | 93        |
| Adult rat ventricular cardiomyocytes              | 100 nM                       | L-type $\text{Ca}^{2+}$ current                   | $\text{Ca}_v1.2$                           | 94        |
| Neonatal rat ventricular cardiomyocytes           | 10 $\mu$ M                   | Cardioprotection                                  | Flavoproteins, $\text{mitoK}_{\text{ATP}}$ | 97        |
| Human radial artery                               | Up to 300 $\mu$ M            | Vasorelaxation                                    | $\text{K}_{\text{ATP}}$                    | 98        |
| Rat aorta                                         | 1 nM - 1 mM                  | Vasorelaxation, inhibits $\text{Ca}^{2+}$ influx. | $\text{K}_{\text{Ca}}$                     | 99        |
| HAECs                                             | Up to 3,5 $\mu$ M            | Vasodilatation                                    | ADM                                        | 100       |
| HAECs                                             | Up to 3,5 $\mu$ M            | Vasoconstriction                                  | Endothelin-1                               | 101       |
| Rhesus monkeys                                    | 50 mg/inj/2wks; 32 months    | Liver function parameters                         | HDL, LDL, SGOT, SGPT                       | 106       |
| Healthy human adults                              | 600 mg/inj/wk; 16 wks        | Not determined                                    | HDL, ApoA1                                 | 107       |
| Eugonadal, obese, elderly men                     | 600 mg/wk; 3 wks             | Not determined                                    | HL, HDL, LDL, SHBG                         | 108       |
| HEPG2 HMDMs                                       | 100 ng/ml                    | Cholesterol transport                             | SR-B1, HL                                  | 114       |
| HMDMs                                             | 10 nM / 100 nM               | Reduced expression of cytokines                   | $\text{TNF-}\alpha$ ; IL-1 $\beta$         | 116       |
| HUVECs                                            | 1 $\mu$ M                    | Opposing effects based on the inflammatory status | UCN1, p38/MAPK, ERK1/2, NF- $\kappa$ B     | 117       |

|                      |                      |                                                                                                         |                                                      |         |
|----------------------|----------------------|---------------------------------------------------------------------------------------------------------|------------------------------------------------------|---------|
| HUVECs               | Up to 1 µM           | Inflammation                                                                                            | VCAM-1                                               | 119     |
| HAECs                | 100 nM, 1 µM         | Vasodilation                                                                                            | VCAM-1                                               | 120     |
| HUVECs               | Up to 100 nM         | Proapoptotic factor                                                                                     | Bcl-2                                                | 121     |
| HUVECs               | 0,1 - 9,6 µM         | Proapoptotic factor                                                                                     | JNK; p38/MAPK                                        | 123     |
| Granulose cells      | Up to 300 nM         | Proapoptotic factor                                                                                     | Cyclin D2; AMPK                                      | 124,125 |
| HK-2; PTECs          | Up to 1 mM           | Proapoptotic factor                                                                                     | Fas; FADD, FasL                                      | 126     |
| SH-SY5Y              | 100 nM/1 µM / 10 µM  | Proapoptotic factor                                                                                     | InsP <sub>3</sub> R                                  | 130,133 |
| Seminiferi tubules   | 100 nM/1 µM          | Antiapoptotic factor                                                                                    | CHECK                                                | 134     |
| CGCs                 | 500 µg/0,05 ml inj   | Antiapoptotic factor                                                                                    | SOD; Catalase                                        | 135,136 |
| PBLs                 | 0,7 µg/ml            | Antiapoptotic factor                                                                                    | Bcl-2; Caspase-3; STAT5A; Gsn; et al                 | 140     |
| PBLs                 | 0,7 µg/ml            | Antiapoptotic factor                                                                                    | Bcl-2; Caspase-3; FAK; Cytokines; paxillin signaling | 141     |
| Healthy human adults | 600 mg/inj/wk; 20wks | Not determined                                                                                          | IGF-1, Hb                                            | 142     |
| PBLs                 | 0,7 µg/ml            | Up-regulation of gene involved in skeletal muscle disorders and in cell-mediated immunological response | IDO1; CXCL13; CCL1; GZMB; VDR; ILR2A                 | 143     |

**Table S2** Summary of molecular effects induced by GH/IGF-1 supraphysiological doses in *in vitro* and *in vivo* systems

| System                                          | Supraphysiological treatment                                                                          | Molecular and biological effect                                                                                                                                                                   | Molecular target                                                          | Reference |
|-------------------------------------------------|-------------------------------------------------------------------------------------------------------|---------------------------------------------------------------------------------------------------------------------------------------------------------------------------------------------------|---------------------------------------------------------------------------|-----------|
| Bovine blastocysts                              | 1000 ng/ml IGF-1 stimulation for 24 h                                                                 | Increased apoptosis and number of cells in the inner cell mass (ICM)                                                                                                                              | TP53, IGF-1R                                                              | 145       |
| Mouse fibroblasts                               | 50 nM IGF-1 stimulation for 3-24 h                                                                    | Anti-apoptotic effects                                                                                                                                                                            | TDAG51                                                                    | 149       |
| Human PBLs                                      | 1.25 µg/ml IGF-1 hyperstimulation                                                                     | Active cytoskeletal reorganization and transendothelial migration                                                                                                                                 | STAT-1, cytokines                                                         | 150       |
| Human PBLs                                      | 1.25 µg/ml IGF-1 hyperstimulation                                                                     | Up-regulation of gene involved in skeletal muscle disorders and in cell-mediated immunological response                                                                                           | FNI, RAB31                                                                | 143       |
| Recreational athletes (males and females)       | GH supraphysiological doses for 8 weeks (1 mg/day I week- 1.5 mg/die II week and 2 mg/die for 6 week) | Modest transcriptional effects of GH-treatment similar in magnitude to the variation between individuals.                                                                                         | HSPC159, ITGB3, OLFM4                                                     | 154       |
| Liver transgenic mice over-expressing bovine GH | Liver GH overexpression after microinjection of PEPCK-GH plasmid into the germ line                   | Alterations in the liver signaling pathways involved in cell growth, proliferation and survival that resemble those found in many human tumors.                                                   | Akt2, NFκB, GSK3β, β-catenin, cyclin D1, cyclin E, c-myc, c-jun and c-fos | 158,159   |
| Healthy adult male rats                         | Long-term (24 weeks) GH gene therapy after injection of adenoviral CMV-GH1 vector                     | Modification of genes associated with angiogenesis, oncogenesis, apoptosis, immune networks, signaling pathways, metabolism, cell adhesion molecules, and cytokine-cytokine receptor interaction. | Pla2g2a, Nfkb1a, Rap1B,                                                   | 160       |
| Mouse                                           | IGF-1                                                                                                 | Marked muscle                                                                                                                                                                                     | Structural proteins                                                       | 161       |

|                      |                                                       |                                                                        |                           |     |
|----------------------|-------------------------------------------------------|------------------------------------------------------------------------|---------------------------|-----|
| model                | overexpression mediated by AAV vectors gene transfer  | hypertrophy, neovascularization and fast-to-slow fiber type transition | Energy metabolism enzymes |     |
| Healthy human adults | GH supraphysiological doses-1 month (0.067 mg/kg/day) | Not determined                                                         | IGFBP-4<br>IGFBP-5        | 162 |
